# Supplementary material
Source: PubMed Central journal article supplement (PMC8270661)
Supplement: advancesADV2020003783-suppl1.pdf [file advancesADV2020003783-suppl1.pdf]

## Supplemental Information

### Supplementary Figure 1

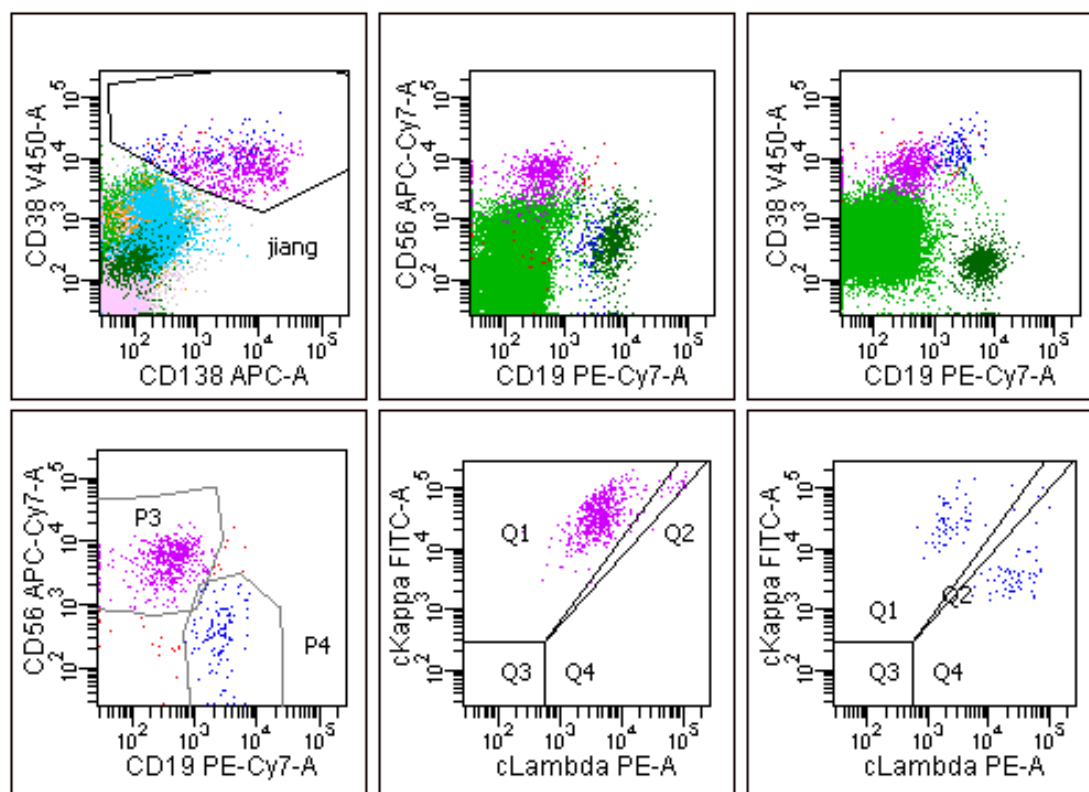

**Supplementary Figure 1. Flow cytometry analysis of nucleated cells from the bone marrow of Patient 1 before treatment.** The cell populations in purple and blue indicate total plasma cells which are CD38+ and CD138+. The cell population in purple accounts for 90.35% of the total plasma cells, which is monoclonal plasma cells expressing CD38+, CD138+, CD56, cKappa, but not CD19 and cLambda. The cell population in blue indicates normal plasma cells which is polyclonal plasma cells expressing CD19, cKappa, and cLambda, and accounts for 7.69% of the total plasma cells.

**Supplementary Figure 2**

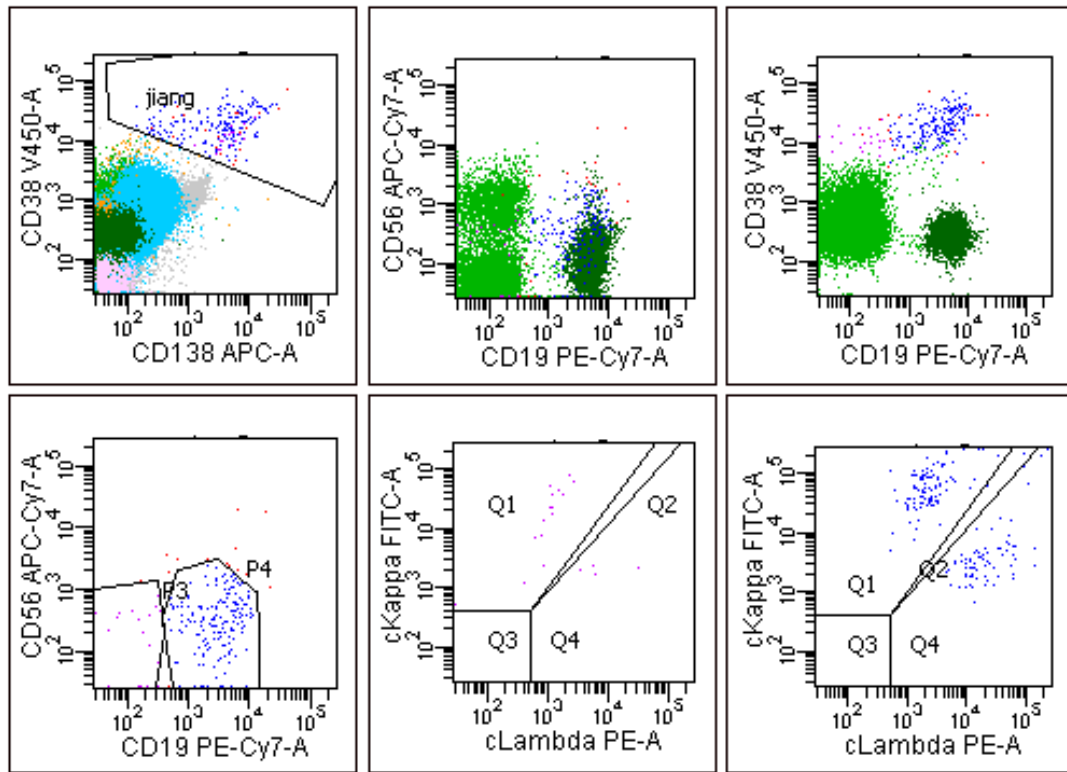

**Supplementary Figure 2. Flow cytometry analysis of nucleated cells from the bone marrow of Patient 1 after treatment with three cycles of VCD regimen. The cell populations in purple and blue indicate plasma cells which are polyclonal plasma cells expressing cKappa, and cLambda.**

**Supplementary Table 1. Summary of whole-genome sequencing metrics.**

| <b>Sample</b>     | <b>Normal</b>   | <b>Tumor</b>    |
|-------------------|-----------------|-----------------|
| Clean Reads       | 1,142,464,366   | 1,178,174,068   |
| Clean Bases       | 171,369,654,900 | 176,726,110,200 |
| Mapped Reads      | 1,139,349,807   | 1,171,364,524   |
| Mapped Bases      | 168,804,446,562 | 173,466,417,314 |
| Mapping Rate (%)  | 99.73           | 99.42           |
| Mean Depth (fold) | 59.48           | 61.12           |

**Supplementary Table2. Summary of all somatic exonic SNVs.**

| Chromosome | Gene      | Position (NCBI37) | Allele change | Amino acid change                  | Type       | Function Prediction |           |
|------------|-----------|-------------------|---------------|------------------------------------|------------|---------------------|-----------|
|            |           |                   |               |                                    |            | SIFT                | PolyPhen2 |
| chr1       | SZT2      | 43903104          | A>G           | p.N2015S                           | Missense   | T                   | B         |
| chr1       | IGSF3     | 117146423         | C>T           | p.G483S, p.G503S                   | Missense   | T                   | P         |
| chr1       | NBPF10    | 145304595         | A>G           | p.T510A                            | Missense   | T                   | B         |
| chr2       | POTEE     | 132021629         | G>T           | p.E867D                            | Missense   | T                   | B         |
| chr2       | NRP2      | 206641017         | A>G           | p.M830V, p.M825V                   | Missense   | T                   | B         |
| chr6       | HIST1H2BM | 27783184          | G>C           | p.K121N                            | Missense   | .                   | B         |
| chr9       | AQP7      | 33395135          | G>C           | p.L29V                             | Missense   | T                   | B         |
| chr9       | AQP7      | 33395136          | T>C           | p.I28M                             | Missense   | T                   | B         |
| chr9       | TMEM245   | 111870745         | G>C           | p.L229V                            | Missense   | T                   | D         |
| chr11      | PGA3      | 60971694          | A>G           | p.K58E                             | Missense   | T                   | B         |
| chr12      | TAS2R43   | 11244243          | T>G           | p.M196L                            | Missense   | T                   | B         |
| chr14      | SLC7A8    | 23612372          | T>G           | p.T79P, p.H11P, p.T184P            | Missense   | D                   | D         |
| chr15      | MCTP2     | 94841753          | A>G           | p.I87V, p.I87V                     | Missense   | T                   | B         |
| chr17      | PLCD3     | 43192762          | C>A           | p.E503D                            | Missense   | T                   | B         |
| chr17      | LRRRC37A3 | 62892919          | C>A           | p.D153Y                            | Missense   | D                   | D         |
| chr18      | CLUL1     | 645051            | G>A           | p.V451I, p.V503I                   | Missense   | T                   | B         |
| chr18      | LOXHD1    | 44139463          | C>T           | p.G1055D                           | Missense   | D                   | D         |
| chr21      | KRTAP10-4 | 45994110          | A>G           | p.I159V                            | Missense   | T                   | B         |
| chrX       | ATG4A     | 107381102         | G>T           | p.A206S                            | Missense   | T                   | B         |
| chr1       | OR2T2     | 248617028         | T>C           | p.G310G                            | synonymous | -                   | -         |
| chr6       | MDFI      | 41621109          | G>A           | p.L118L, p.L179L, p.L179L, p.L179L | synonymous | -                   | -         |
| chr7       | MUC12     | 100644692         | A>G           | p.T3616T                           | synonymous | -                   | -         |
| chr14      | RBM23     | 23371268          | A>G           | p.A355A                            | synonymous | -                   | -         |
| chr22      | IGLL5     | 23230314          | G>A           | p.L27L                             | synonymous | -                   | -         |
| chr7       | IQCA1L    | 150894944         | T>A           | unknown                            | unknown    | -                   | -         |

**Supplementary Table 3. Summary of somatic structural variants of deletion, duplication, and inversion.**

| Chromosome | Break 1 Location | Break 2 Location | Structural variant | cytoBand     |
|------------|------------------|------------------|--------------------|--------------|
| Chr2       | 33141401         | 62435304         | Deletion           | 2p22.3-p15   |
| Chr7       | 72788842         | 72789445         | Deletion           | 7q11.23      |
| Chr13      | 113518013        | 113519239        | Deletion           | 13q34        |
| Chr2       | 3925437          | 33141405         | Duplication        | 2p25.3-p22.3 |
| Chr10      | 53984356         | 54034064         | Duplication        | 10q21.1      |
| Chr15      | 23103187         | 23104146         | Duplication        | 15q11.2      |
| Chr22      | 23686256         | 25070295         | Duplication        | 22q11.23     |
| Chr2       | 14091693         | 33141660         | Inversion          | 2p24.3-p22.3 |
| Chr2       | 33141401         | 126175986        | Inversion          | 2p22.3-q14.3 |
| Chr2       | 130886757        | 131967215        | Inversion          | 2q21.1       |
| Chr6       | 19429630         | 19430529         | Inversion          | 6p22.3       |
| Chr7       | 5943362          | 6861029          | Inversion          | 7p22.1       |
| Chr13      | 111736773        | 112875947        | Inversion          | 13q34        |
| Chr19      | 14508801         | 14876285         | Inversion          | 19p13.12     |

**Supplementary Table 4. Summary of somatic structural variants of translocation.**

| Chromosome | Break Location | Break Genes                | Structural variant | cytoBand |
|------------|----------------|----------------------------|--------------------|----------|
| chr2       | 33141638       | LINC00486                  | t(2;3)             | 2p22.3   |
| chr3       | 96623378       | EPHA6                      |                    | 3q11.2   |
| chr2       | 33141687       | LINC00486                  | t(2;4)             | 2p22.3   |
| chr4       | 18579684       | LCORL,SLIT2                |                    | 4p15.31  |
| chr2       | 33141401       | LINC00486                  | t(2;5)             | 2p22.3   |
| chr5       | 32927139       | NPR3,LOC340113             |                    | 5p13.3   |
| chr2       | 33141694       | LINC00486                  | t(2;5)             | 2p22.3   |
| chr5       | 99197896       | CTD-2151A2.1, LOC100133050 |                    | 5q21.1   |
| chr2       | 33141403       | LINC00486                  | t(2;6)             | 2p22.3   |
| chr6       | 56643339       | DST                        |                    | 6p12.1   |
| chr2       | 33141404       | LINC00486                  | t(2;6)             | 2p22.3   |
| chr6       | 74872386       | LOC101928516               |                    | 6q13     |
| chr2       | 33141639       | LINC00486                  | t(2;6)             | 2p22.3   |
| chr6       | 86801100       | SNHG5,HTR1E                |                    | 6q14.3   |
| chr2       | 33141659       | LINC00486                  | t(2;8)             | 2p22.3   |
| chr8       | 23646300       | NKX2-6,STC1                |                    | 8p21.2   |
| chr2       | 114259009      | FOXD4L1                    | t(2;9)             | 2q13     |
| chr9       | 115895         | FOXD4                      |                    | 9p24.3   |
| chr2       | 33141412       | LINC00486                  | t(2;9)             | 2p22.3   |
| chr9       | 30171321       | LINGO2,LINC01242           |                    | 9p21.1   |
| chr2       | 33141661       | LINC00486                  | t(2;10)            | 2p22.3   |
| chr10      | 36583876       | PCAT5,ANKRD30A             |                    | 10p11.21 |
| chr2       | 33141414       | LINC00486                  | t(2;11)            | 2p22.3   |
| chr11      | 26141043       | LUZP2,ANO3                 |                    | 11p14.2  |
| chr2       | 33141401       | LINC00486                  | t(2;11)            | 2p22.3   |
| chr11      | 105333708      | CARD18,GRIA4               |                    | 11q22.3  |
| chr2       | 33141658       | LINC00486                  | t(2;13)            | 2p22.3   |
| chr13      | 49856044       | CDADC1                     |                    | 13q14.2  |

**Supplementary Table 4 (continued)**

| <b>Chromosome</b> | <b>Break Location</b> | <b>Break Genes</b>  | <b>Structural variant</b> | <b>cytoBand</b> |
|-------------------|-----------------------|---------------------|---------------------------|-----------------|
| chr2              | 33141639              | LINC00486           | t(2;13)                   | 2p22.3          |
| chr13             | 62381521              | PCDH20,LINC00358    |                           | 13q21.31        |
| chr2              | 33141694              | LINC00486           | t(2;13)                   | 2p22.3          |
| chr13             | 89486464              | LINC00433,LINC01047 |                           | 13q31.2         |
| chr2              | 33141408              | LINC00486           | t(2;15)                   | 2p22.3          |
| chr15             | 29411569              | FAM189A1            |                           | 15q13.1         |
| chr2              | 33141297              | LINC00486           | t(2;19)                   | 2p22.3          |
| chr19             | 9902597               | ZNF846,FBXL12       |                           | 19p13.3         |
| chr12             | 113257085             | RPH3A               | t(2;19)                   | 12q24.13        |
| chr19             | 1520904               | ADAMTSL5,PLK5       |                           | 19p13.2         |
| chr2              | 33141401              | LINC00486           | t(2;20)                   | 2p22.3          |
| chr20             | 12118230              | BTBD3,LOC101929486  |                           | 20p12.1         |
| chr2              | 33141297              | LINC00486           | t(2;20)                   | 2p22.3          |
| chr20             | 31209110              | LOC149950,C20orf203 |                           | 20q11.21        |
| chr2              | 33141657              | LINC00486           | t(2;X)                    | 2p22.3          |
| chrX              | 21433702              | CNKSR2              |                           | Xp22.12         |
| chr2              | 33141401              | LINC00486           | t(2;X)                    | 2p22.3          |
| chrX              | 69053823              | EDA                 |                           | Xq13.1          |
| chr2              | 33141464              | LINC00486           | t(2;X)                    | 2p22.3          |
| chrX              | 85189454              | CHM                 |                           | Xq21.2          |

**Supplementary Table 5. Clinical information of patients with TEMPI syndrome.**

| Characteristic                                                                | Patient 1                                 | Patient 2                               | Patient 3                                                               |
|-------------------------------------------------------------------------------|-------------------------------------------|-----------------------------------------|-------------------------------------------------------------------------|
| <b>Demographic</b>                                                            |                                           |                                         |                                                                         |
| Age                                                                           | 52                                        | 60                                      | 57                                                                      |
| Sex                                                                           | Female                                    | Male                                    | Male                                                                    |
| Year of presentation                                                          | July 2017                                 | January 2020                            | August 2020                                                             |
| <b>TEMPI syndrome</b>                                                         |                                           |                                         |                                                                         |
| Telangiectasias, most prominent over the face, trunk, arms, and hands         | Yes                                       | Yes                                     | Yes                                                                     |
| Erythrocytosis                                                                | Yes                                       | Yes                                     | Yes                                                                     |
| Hematocrit at presentation (%)                                                | 62%                                       | 52.3%                                   | 61.2%                                                                   |
| Erythropoietin (mU/ml)                                                        | 106                                       | 676.16                                  | 741                                                                     |
| Monoclonal gammopathy                                                         | IgG-KAP (7.1g/L)                          | IgA-KAP (5.1g/L)                        | IgG-KAP (9.6g/L)                                                        |
| Plasma cells (%)                                                              | 7%                                        | 3%                                      | 2.5%                                                                    |
| Perinephric fluid                                                             | Yes                                       | Yes                                     | Yes                                                                     |
| Requiring surgical marsupialization                                           | No                                        | No                                      | No                                                                      |
| Intrapulmonary shunting                                                       | Yes                                       | Yes                                     | Yes                                                                     |
| <b>Other</b>                                                                  |                                           |                                         |                                                                         |
| Venous thrombosis                                                             | No                                        | No                                      | No                                                                      |
| Spontaneous intracranial hemorrhage                                           | No                                        | No                                      | No                                                                      |
| Pleural and abdominal effusion                                                | Left pleural effusion, abdominal effusion | Pleural, abdominal, and pelvic effusion | Right pleural effusion, abdominal, pelvic, and retroperitoneal effusion |
| β2- microglobulin                                                             | 3.3mg/L                                   | 2.6mg/L                                 | 2.7mg/L                                                                 |
| LDH                                                                           | 300U/L                                    | 237U/L                                  | 259U/L                                                                  |
| BCR/ABL translocation and mutations of JAK2V617F, JAK2 exon 12, CALR, and MFL | Negative                                  | Negative                                | Negative                                                                |
